# Supplementary material for: Facile functionalization of a tetrahedron-like PEG macromonomer-based fluorescent hydrogel with high strength and its heavy metal ion detection
Source: Royal Society of Chemistry journal article supplement (doi:10.1039/c4ta05736h), 2014-11-19
Supplement: c4ta05736h1.pdf [file c4ta05736h1.pdf]

## Supporting information

### Facile Functionalization of Tetrahedron-like PEG Macromonomer-based Fluorescent Hydrogel with High Strength and Its Specific Metal Ions Detection

*Haiyan Jia, Zhao Li, Xinling Wang and Zhen Zheng\**

School of Chemistry and Chemical Engineering, State Key Laboratory of Metal  
Matrix Composites, Shanghai Jiao Tong University, Shanghai 200240, China;

E-mail: [zzheng@sjtu.edu.cn](mailto:zzheng@sjtu.edu.cn); Fax: +86 21 5474 1297; Tel: +86 21 5474 5817

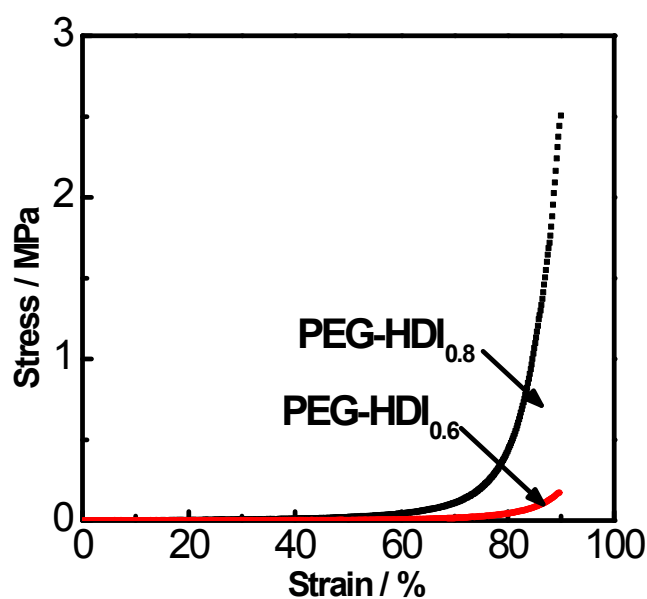

**Figure S1.** The stress-strain curves for PEG-HDI<sub>0.6</sub> hydrogel and PEG-HDI<sub>0.8</sub> hydrogel.

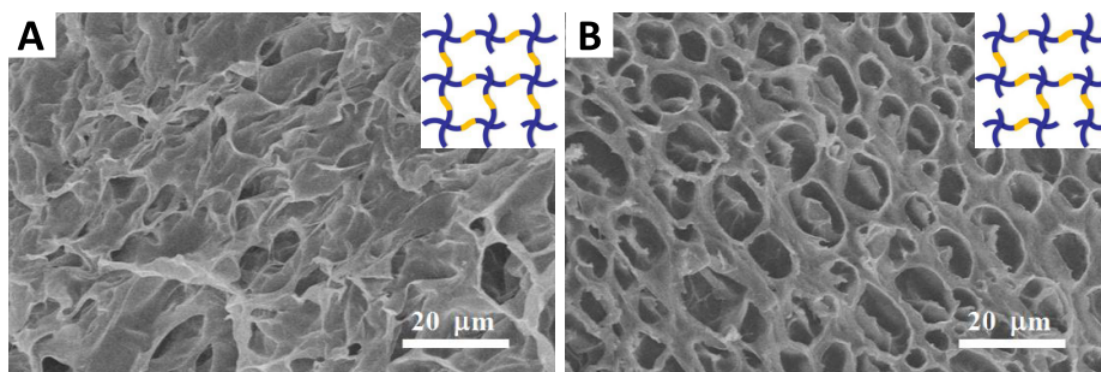

**Figure S2.** SEM images of (A) PEG-HDI<sub>0.6</sub> gel and (B) PEG-HDI<sub>0.8</sub> gel. Insert: ideal molecular model of respective hydrogel on the top right of the SEM images.

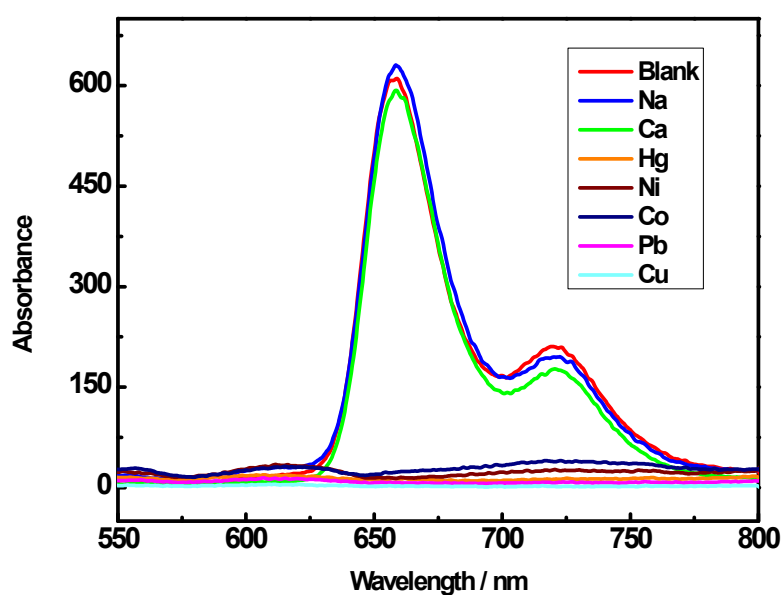

**Figure S3.** Fluorescence spectra of PEG-HDI<sub>1.2</sub>-TPP hydrogels in different metal ions aqueous solution (0.25 M). The wavelength of exciting light is 420 nm.

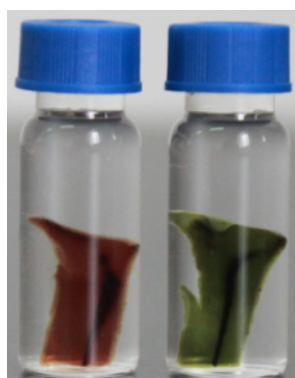

**Figure S4.** Photographs of PEG-HDI<sub>1.2</sub>-TPP hydrogels in Tris-HClO<sub>4</sub> buffer solution (left) and in Hg<sup>2+</sup> solution (10 mM, right), pH values of these solution are all 7.0, controlled by the Tris-HClO<sub>4</sub> buffer solution.
